# Supplementary material for: Physical Activity Level Following Resistance Training in Community-Dwelling Older Adults Receiving Home Care: Results from a Cluster-Randomized Controlled Trial
Source: MDPI journal article supplement (doi:10.3390/ijerph18136682), 2021-06-22
Supplement: s1 [file s1]

Table S4. Sensitivity analysis with adjustment for body mass index, age, and accelerometer wear time.

| Outcome              | n   | Baseline<br>Mean<br>(95% CI) | 4 months             |                     | Between-group<br>difference |          | 8 months             |                     | Between-group difference |          |
|----------------------|-----|------------------------------|----------------------|---------------------|-----------------------------|----------|----------------------|---------------------|--------------------------|----------|
|                      |     |                              | RTG<br>Mean (95% CI) | CG<br>Mean (95% CI) | Mean (95% CI)               | <i>p</i> | RTG<br>Mean (95% CI) | CG<br>Mean (95% CI) | Mean (95% CI)            | <i>p</i> |
| TPA<br>(cpm)         | 100 | 264 (218-309)                | 241 (193-289)        | 236 (185-286)       | 5 (-28-38)                  | 0.757    | 257 (206-307)        | 238 (187-290)       | 18 (-19-56)              | 0.343    |
| SB<br>(min/day)      | 100 | 616 (591-641)                | 630 (603-657)        | 629 (601-658)       | 1 (-21-22)                  | 0.958    | 617 (588-645)        | 628 (599-657)       | -11 (-36-13)             | 0.368    |
| LPA<br>(min/day)     | 100 | 161 (145-178)                | 151 (133-170)        | 152 (131-172)       | -1 (-19-18)                 | 0.953    | 163 (143-184)        | 153 (131-174)       | 10 (-10-31)              | 0.325    |
| MVPA<br>(min/day)    | 100 | 34 (25-43)                   | 30 (21-40)           | 30 (20-40)          | 0 (-6-7)                    | 0.530    | 32 (22-42)           | 31 (21-41)          | 1 (-6-8)                 | 0.728    |
| Steps<br>(steps/day) | 100 | 6146 (5350-6943)             | 5477 (4623-6332)     | 5700 (4773-6626)    | -222 (-929-484)             | 0.538    | 5990 (5067-6912)     | 6001 (5058-6946)    | -12 (-825-801)           | 0.977    |

Estimated means and 95% confidence intervals (95% CI) using linear mixed models (adjusted model 2). RTG, resistance training group; CG, control group; TPA, total physical activity; cpm, counts per minute; SB, sedentary behavior; LPA, light physical activity; MVPA, moderate-to-vigorous physical activity.
