# Supplementary material for: Physical Activity Level Following Resistance Training in Community-Dwelling Older Adults Receiving Home Care: Results from a Cluster-Randomized Controlled Trial
Source: MDPI journal article supplement (doi:10.3390/ijerph18136682), 2021-06-22
Supplement: s1 [file s1]

Table S2. Sensitivity analysis including participants above 70 years.

| Outcome              | n  | Baseline<br>Mean<br>(95% CI) | 4 months             |                     | Between-group<br>difference |          | 8 months                |                        | Between-group difference |          |
|----------------------|----|------------------------------|----------------------|---------------------|-----------------------------|----------|-------------------------|------------------------|--------------------------|----------|
|                      |    |                              | RTG<br>Mean (95% CI) | CG<br>Mean (95% CI) | Mean<br>(95% CI)            | <i>p</i> | RTG<br>Mean<br>(95% CI) | CG<br>Mean<br>(95% CI) | Mean<br>(95% CI)         | <i>p</i> |
| TPA<br>(cpm)         | 94 | 268 (220-315)                | 238 (188-288)        | 239 (187-292)       | -1 (-35-32)                 | 0.925    | 254 (202-306)           | 237 (184-289)          | 17 (-20-54)              | 0.367    |
| SB<br>(min/day)      | 94 | 612 (588-639)                | 623 (596-651)        | 629 (598-661)       | -6 (-37-25)                 | 0.721    | 614 (583-645)           | 625 (593-656)          | -11 (-45-24)             | 0.542    |
| LPA<br>(min/day)     | 94 | 163 (145-181)                | 151 (131-171)        | 153 (130-175)       | -2 (-22-19)                 | 0.885    | 162 (140-184)           | 156 (133-179)          | 6 (-16-29)               | 0.583    |
| MVPA<br>(min/day)    | 94 | 35 (25-45)                   | 30 (19-40)           | 30 (19-41)          | 0 (-7-6)                    | 0.879    | 32 (21-43)              | 29 (18-40)             | 3 (-4-10)                | 0.376    |
| Steps<br>(steps/day) | 94 | 6185<br>(5309-7060)          | 5354<br>(4404-6303)  | 5701<br>(4687-6715) | -347<br>(-1131-436)         | 0.385    | 5889<br>(4881-6896)     | 6016<br>(4995-7036)    | -127<br>(-988-735)       | 0.385    |

Estimated means and 95% confidence intervals (95% CI) using linear mixed models (unadjusted model). RTG, resistance training group; CG,

control group; TPA, total physical activity; cpm, counts per minute; SB, sedentary behavior; LPA, light physical activity; MVPA, moderate-to-vigorous physical activity.
