# Supplementary material for: Physical Activity Level Following Resistance Training in Community-Dwelling Older Adults Receiving Home Care: Results from a Cluster-Randomized Controlled Trial
Source: MDPI journal article supplement (doi:10.3390/ijerph18136682), 2021-06-22
Supplement: s1 [file s1]

Table S1. Per protocol analysis including participants with  $\geq 60\%$  attendance to training.

| Outcome              | n  | Baseline<br>Mean (95% CI) | 4 months                |                        | Between-group<br>difference |          | 8 months                |                        | Between-group<br>difference |          |
|----------------------|----|---------------------------|-------------------------|------------------------|-----------------------------|----------|-------------------------|------------------------|-----------------------------|----------|
|                      |    |                           | RTG<br>Mean<br>(95% CI) | CG<br>Mean<br>(95% CI) | Mean<br>(95% CI)            | <i>p</i> | RTG<br>Mean<br>(95% CI) | CG<br>Mean<br>(95% CI) | Mean<br>(95% CI)            | <i>p</i> |
| TPA (cpm)            | 66 | 270 (221-319)             | 249 (196-302)           | 242 (189-294)          | 7 (30-44)                   | 0.699    | 270 (216-324)           | 240 (187-292)          | 30 (-9-69)                  | 0.127    |
| SB<br>(min/day)      | 66 | 621 (591-651)             | 630 (593-667)           | 636 (600-672)          | -6 (-43-32)                 | 0.762    | 616 (578-667)           | 633 (596-669)          | -16 (-56-24)                | 0.424    |
| LPA<br>(min/day)     | 66 | 158 (142-175)             | 153 (132-175)           | 147 (127-168)          | 6 (-17-29)                  | 0.609    | 165 (142-188)           | 150 (129-171)          | 15 (-10-39)                 | 0.242    |
| MVPA<br>(min/day)    | 66 | 36 (26-46)                | 32 (22-43)              | 32 (21-42)             | 0 (-6-8)                    | 0.827    | 35 (24-46)              | 30 (20-41)             | 5 (-2-12)                   | 0.191    |
| Steps<br>(steps/day) | 66 | 6108<br>(5205-7017)       | 5388<br>(4363-6419)     | 5632<br>(4616-6647)    | -244<br>(-1114-626)         | 0.583    | 6120<br>(5063-7178)     | 5937<br>(4916-6959)    | 183<br>(-734-1100)          | 0.696    |

Estimated means and 95% confidence intervals (95% CI) using linear mixed models (unadjusted model). RTG, resistance training group; CG, control group; TPA, total physical activity; cpm, counts per minute; SB, sedentary behavior; LPA, light physical activity; MVPA, moderate-to-vigorous physical activity.
