# Supplementary material for: Physical Activity Level Following Resistance Training in Community-Dwelling Older Adults Receiving Home Care: Results from a Cluster-Randomized Controlled Trial
Source: MDPI journal article supplement (doi:10.3390/ijerph18136682), 2021-06-22
Supplement: s1 [file s1]

Table S3. Sensitivity analysis without combined baseline, but adjusted for baseline value of the outcome.

| Outcome              | n  | Baseline                |                        | 4 months                |                        | Between-group difference |          | 8 months                |                        | Between-group difference |          | p-value |       |                |
|----------------------|----|-------------------------|------------------------|-------------------------|------------------------|--------------------------|----------|-------------------------|------------------------|--------------------------|----------|---------|-------|----------------|
|                      |    | RTG<br>Mean<br>(95% CI) | CG<br>Mean<br>(95% CI) | RTG<br>Mean<br>(95% CI) | CG<br>Mean<br>(95% CI) | Mean<br>(95% CI)         | <i>p</i> | RTG<br>Mean<br>(95% CI) | CG<br>Mean<br>(95% CI) | Mean<br>(95% CI)         | <i>p</i> | Group   | Time  | Group<br>×Time |
| TPA (cpm)            | 99 | 263<br>(249-277)        | 258<br>(241-275)       | 239<br>(233-255)        | 228<br>(207-248)       | 11<br>(-14-37)           | 0.390    | 249<br>(229-268)        | 230<br>(209-250)       | 19<br>(-9-48)            | 0.187    | 0.180   | 0.000 | 0.702          |
| SB (min/day)         | 99 | 610<br>(588-632)        | 636<br>(609-662)       | 620<br>(596-643)        | 651<br>(621-681)       | -31<br>(-69-7)           | 0.109    | 614<br>(587-641)        | 642<br>(612-672)       | -28 (-68-13)             | 0.180    | 0.087   | 0.287 | 0.947          |
| LPA (min/day)        | 99 | 163<br>(155-171)        | 159<br>(149-169)       | 149<br>(140-159)        | 151<br>(139-163)       | -2<br>(-17-13)           | 0.799    | 162<br>(150-174)        | 151<br>(139-164)       | 11 (-7-28)               | 0.229    | 0.401   | 0.075 | 0.511          |
| MVPA<br>(min/day)    | 99 | 34<br>(31-37)           | 33<br>(30-37)          | 30<br>(27-38)           | 28<br>(24-32)          | 2<br>(-3-7)              | 0.498    | 31<br>(27-35)           | 28<br>(24-32)          | 3<br>(-2-9)              | 0.245    | 0.290   | 0.001 | 0.692          |
| Steps<br>(steps/day) | 99 | 6204<br>(5904-6503)     | 6052<br>(5677-6426)    | 5440<br>(5029-5787)     | 5642<br>(5189-6096)    | -202<br>(-777-372)       | 0.490    | 5904<br>(5463-6345)     | 5860<br>(5399-6321)    | 44<br>(-599-686)         | 0.894    | 0.990   | 0.003 | 0.589          |

Estimated means and 95% confidence intervals (95% CI) using linear mixed models (adjusted model 1). RTG, resistance training group; CG,

control group; TPA, total physical activity; cpm, counts per minute; SB, sedentary behavior; LPA, light physical activity; MVPA, moderate-to-vigorous physical activity.
